# Supplementary material for: Exploring the Relationship between CLPTM1L-MS2 Variants and Susceptibility to Bladder Cancer
Source: MDPI journal article supplement (doi:10.3390/genes15010050), 2023-12-28

Table S1. Frequency of *CLPTM1L*-VNTR (MS1, MS3, MS4) alleles between controls and bladder cancer cases

| TR     | Size | Cancer-free controls |           | Bladder cancer |           | OR (95% CI)       | P      |
|--------|------|----------------------|-----------|----------------|-----------|-------------------|--------|
|        |      | N=856                | Frequency | N=340          | Frequency |                   |        |
| MS1 TR |      |                      |           |                |           |                   |        |
| 12     | 866  | 3                    | 0.0035    | 2              | 0.0059    | 1.68 (0.28-10.11) | 0.5654 |
| 15     | 1058 | 849                  | 0.9918    | 336            | 0.9882    | 0.69 (0.20-2.38)  | 0.5578 |
| 18     | 1250 | 1                    | 0.0012    | 0              | -         | ND                | 0.5284 |
| 21     | 1442 | 1                    | 0.0012    | 1              | 0.0029    | 2.52 (0.16-40.44) | 0.4985 |
| 26     | 1762 | 2                    | 0.0023    | 1              | 0.0029    | 1.26 (0.11-13.94) | 0.8504 |
| TR     | Size | N=834                | Frequency | N=342          | Frequency | OR (95% CI)       | P      |
| MS3 TR |      |                      |           |                |           |                   |        |
| 76     | 2386 | 19                   | 0.0228    | 11             | 0.0322    | 1.43 (0.67-3.03)  | 0.3541 |
| 94     | 2908 | 24                   | 0.0288    | 13             | 0.0380    | 1.33 (0.67-2.65)  | 0.4100 |
| 96     | 2966 | 632                  | 0.7578    | 254            | 0.7427    | 0.92 (0.69-1.23)  | 0.5853 |
| 98     | 3024 | 8                    | 0.0096    | 2              | 0.0058    | 0.61 (0.13-2.87)  | 0.5254 |
| 100    | 3082 | 11                   | 0.0132    | 5              | 0.0146    | 1.11 (0.38-3.22)  | 0.8475 |
| 102    | 3140 | 114                  | 0.1367    | 47             | 0.1374    | 1.01 (0.70-1.45)  | 0.9734 |
| 104    | 3198 | 10                   | 0.0120    | 2              | 0.0058    | 0.48 (0.11-2.22)  | 0.3412 |
| 106    | 3256 | 2                    | 0.0024    | 1              | 0.0029    | 1.22 (0.11-13.50) | 0.8710 |
| 109    | 3343 | 2                    | 0.0024    | 3              | 0.0088    | 3.68 (0.61-22.13) | 0.1271 |
| 112    | 3430 | 12                   | 0.0144    | 3              | 0.0088    | 0.61 (0.17-2.16)  | 0.4357 |
| 128    | 3894 | 0                    | -         | 1              | 0.0029    | ND                | 0.1182 |
| TR     | Size | N=864                | Frequency | N=340          | Frequency | OR (95% CI)       | P      |
| MS4 TR |      |                      |           |                |           |                   |        |
| 6      | 416  | 16                   | 0.0185    | 12             | 0.0353    | 1.94 (0.91-4.14)  | 0.0821 |
| 8      | 530  | 848                  | 0.9815    | 328            | 0.9647    | 0.52 (0.24-1.10)  |        |

OR, odds ratio; CI, confidence interval; ND, not determined

Table S2. Frequency of *CLPTM1L*-VNTR (MS1, MS3, MS4) genotypes between controls and bladder cancer cases

| Genotype | Cancer-free controls |           | Bladder cancer |           | OR (95% CI)       | <i>P</i> |
|----------|----------------------|-----------|----------------|-----------|-------------------|----------|
| MS1      | N=428                | Frequency | N=170          | Frequency |                   |          |
| 12/15    | 3                    | 0.0070    | 2              | 0.0118    | 1.69 (0.28-10.18) | 0.5646   |
| 15/15    | 421                  | 0.9836    | 166            | 0.9765    | 0.69 (0.20-2.39)  | 0.5559   |
| 15/18    | 1                    | 0.0023    | 0              | -         | ND                | 0.5282   |
| 15/21    | 1                    | 0.0023    | 1              | 0.0059    | 2.53 (0.16-40.63) | 0.4981   |
| 15/26    | 2                    | 0.0047    | 1              | 0.0059    | 1.26 (0.11-13.99) | 0.8502   |
| MS3      | N=417                | Frequency | N=171          | Frequency | OR (95% CI)       | <i>P</i> |
| 76/76    | 3                    | 0.0072    | 3              | 0.0175    | 2.46 (0.49-12.33) | 0.2568   |
| 76/96    | 12                   | 0.0288    | 4              | 0.0234    | 0.81 (0.26-2.54)  | 0.7155   |
| 76/102   | 0                    | -         | 1              | 0.0058    | ND                | 0.1181   |
| 76/112   | 1                    | 0.0024    | 0              | -         | ND                | 0.5216   |
| 94/94    | 11                   | 0.0264    | 6              | 0.0351    | 1.34 (0.49-3.69)  | 0.5671   |
| 94/100   | 1                    | 0.0024    | 0              | -         | ND                | 0.5216   |
| 94/102   | 1                    | 0.0024    | 1              | 0.0058    | 2.45 (0.15-39.35) | 0.5141   |
| 96/96    | 256                  | 0.6139    | 104            | 0.6082    | 0.98 (0.68-1.41)  | 0.8971   |
| 96/98    | 8                    | 0.0192    | 2              | 0.0117    | 0.61 (0.13-2.88)  | 0.5236   |
| 96/100   | 7                    | 0.0168    | 3              | 0.0175    | 1.05 (0.27-4.09)  | 0.9486   |
| 96/102   | 72                   | 0.1727    | 29             | 0.1696    | 0.98 (0.61-1.57)  | 0.9286   |
| 96/104   | 9                    | 0.0216    | 2              | 0.0117    | 0.54 (0.11-2.51)  | 0.4216   |
| 96/106   | 1                    | 0.0024    | 1              | 0.0058    | 2.45 (0.15-39.35) | 0.5141   |
| 96/109   | 1                    | 0.0024    | 1              | 0.0058    | 2.45 (0.15-39.35) | 0.5141   |
| 96/112   | 10                   | 0.0240    | 3              | 0.0175    | 0.73 (0.20-2.67)  | 0.6297   |
| 96/128   | 0                    | -         | 1              | 0.0058    | ND                | 0.1181   |
| 100/100  | 0                    | -         | 1              | 0.0058    | ND                | 0.1181   |
| 100/102  | 3                    | 0.0072    | 0              | -         | ND                | 0.2661   |
| 102/102  | 18                   | 0.0432    | 8              | 0.0468    | 1.09 (0.46-2.55)  | 0.8463   |
| 102/109  | 1                    | 0.0024    | 0              | -         | ND                | 0.5216   |
| 102/112  | 1                    | 0.0024    | 0              | -         | ND                | 0.5216   |
| 104/106  | 1                    | 0.0024    | 0              | -         | ND                | 0.5216   |
| 109/109  | 0                    | -         | 1              | 0.0058    | ND                | 0.1181   |
| MS4      | N=432                | Frequency | N=170          | Frequency | OR (95% CI)       | <i>P</i> |
| 6/8      | 16                   | 0.0370    | 12             | 0.0706    | 1.97 (0.91-4.27)  | 0.0785   |
| 8/8      | 416                  | 0.9630    | 158            | 0.9294    | 0.51 (0.23-1.09)  |          |

OR, odds ratio; CI, confidence interval; ND, not determined

Table S3. Composition of repeat units in most common alleles of *CLPTM1L*-MS2

| Repeat unit   | Sequences                                                 |
|---------------|-----------------------------------------------------------|
| Consensus     | TGAGGCCCTGTCCACCAAGCAGAGAGTCC                             |
| MS2-1         | TGAGGC <u>I</u> CTGTCCACCAAGCAGT <u>TGGT</u> GAGTCC       |
| MS2-2         | TGAGGCCCTGTCCACCAAGCAGAT <u>I</u> AGTCC                   |
| MS2-3         | TGAGGCCCTGTCCACCAAGCAGAGAGTCC                             |
| MS2-4         | TGAGGC <u>I</u> CTGTCCACCAAGCAGAGAGTCC                    |
| MS2-5         | TGAGGC <u>I</u> CTGTCCACCA <u>G</u> GCAGAGAGTCC           |
| MS2-6         | TGAGGCCCTGTCCACCA <u>G</u> GCAGAGAGTCC                    |
| MS2-7         | TGAGGCCCTGTCCACCAAGCAGT <u>TGGT</u> GAGTCC                |
| MS2-8         | TGAGGCCCTGTCCACCAAGCAGAG <u>GCC</u>                       |
| <b>MS2-TR</b> | <b>Composition of repeat units in most common alleles</b> |
| MS2-23TR      | 1-2-1-3-3-4-4-3-3-5-6-4-6-6-6-3-3-4-4-7-8-△               |

△: 0.8 repeat

Table S4. Analysis of identities between repeat units in *CLPTM1L*-MS2

| <b>Identities (%)</b> | <b>MS2-1</b> | <b>MS2-2</b> | <b>MS2-3</b> | <b>MS2-4</b> | <b>MS2-5</b> | <b>MS2-6</b> | <b>MS2-7</b> | <b>MS2-8</b> |
|-----------------------|--------------|--------------|--------------|--------------|--------------|--------------|--------------|--------------|
| MS2-1                 | 100          |              |              |              |              |              |              |              |
| MS2-2                 | 81           | 100          |              |              |              |              |              |              |
| MS2-3                 | 84           | 97           | 100          |              |              |              |              |              |
| MS2-4                 | 88           | 93           | 97           | 100          |              |              |              |              |
| MS2-5                 | 84           | 90           | 93           | 97           | 100          |              |              |              |
| MS2-6                 | 81           | 93           | 97           | 93           | 97           | 100          |              |              |
| MS2-7                 | 97           | 84           | 88           | 84           | 81           | 84           | 100          |              |
| MS2-8                 | 78           | 90           | 90           | 86           | 83           | 86           | 81           | 100          |

Supplementary Figure S1. Composition of putative transcriptional factors on most common alleles of *CLPTM1L*-MS2

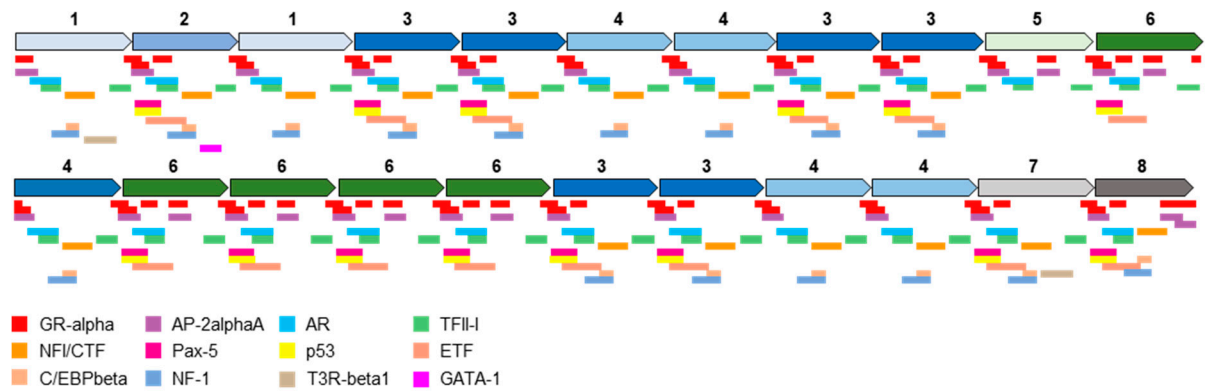

Supplement: s1 [file s1]
